# Supplementary material
Source: PubMed Central journal article supplement (PMC5127409)
Supplement: NIHMS831069-supplement-Supplementary_Information_Table_1_.pdf [file NIHMS831069-supplement-Supplementary_Information_Table_1_.pdf]

Supplemental Table 1: Antibodies

| <b>Epitope</b>     | <b>Concentration</b> | <b>Manufacturer</b>                                  |
|--------------------|----------------------|------------------------------------------------------|
| <b>Ubiquitin</b>   | 1:250                | Dako, Denmark                                        |
| <b>1C2</b>         | 1:1000               | Chemicon/Millipore, Billerica, MA                    |
| <b>GFAP</b>        | 1:500                | Dako, Denmark                                        |
| <b>Synuclein-1</b> | 1:500                | Transduction Labs/BD Biosciences, Franklin Lakes, NJ |
| <b>PHF-1</b>       | 1:100                | Gift of Dr. P. Davies                                |
| <b>TDP-43</b>      | 1:500                | Proteintech Group, Chicago, Illinois                 |
